# Supplementary material
Source: PubMed Central journal article supplement (PMC5085875)
Supplement: NIHMS806277-supplement-2.pdf [file NIHMS806277-supplement-2.pdf]

|                                                                   |                         | <b>Standard Model (Gy)</b> | <b>Partition Model (Gy)</b> | <b>Mean Monte Carlo (Gy)</b> |
|-------------------------------------------------------------------|-------------------------|----------------------------|-----------------------------|------------------------------|
| <b>ALL PATIENTS</b>                                               | <b>Tumors</b>           | 89.4 +/- 26.7 (N=19)       | 226.3 +/- 186.6 (N=19)      | 119.9 +/- 90.5 (N=37)        |
|                                                                   | <b>NonTumoral Liver</b> | 89.4 +/- 26.7 (N=19)       | 77.1 +/- 36.9 (N=19)        | 47.8 +/- 21.7 (N=19)         |
| <b>PATIENTS WITH SINGLE TUMOR</b>                                 | <b>Tumors</b>           | 86.2 +/- 32.4 (N=7)        | 303.6 +/- 245.8 (N=7)       | 170.6 +/- 128.4 (N=7)        |
|                                                                   | <b>NonTumoral Liver</b> | 86.2 +/- 32.4 (N=7)        | 71.8 +/- 44.6 (N=7)         | 40.6 +/- 23.3 (N=7)          |
| <b>PATIENTS WITH MULTIPLE TUMORS</b>                              | <b>Tumors</b>           | 91.3 +/- 24.2 (N=12)       | 181.2 +/- 134.3 (N=12)      | 108.0 +/- 77.4 (N=30)        |
|                                                                   | <b>NonTumoral Liver</b> | 91.3 +/- 24.2 (N=12)       | 80.2 +/- 33.4 (N=12)        | 51.9 +/- 20.6 (N=12)         |
|                                                                   |                         |                            |                             |                              |
| <b>Mean +/- Standard deviation of Dose Calculations by Subset</b> |                         |                            |                             |                              |
|                                                                   |                         |                            |                             |                              |
